# Supplementary material for: PPARG Pro12Ala Polymorphism with CKD in Asians: A Meta-Analysis Combined with a Case-Control Study—A Key for Reaching Null Association
Source: MDPI journal article supplement (doi:10.3390/genes11060705), 2020-06-26
Supplement: s1 [file s1]

**S2 Table. Search strategies and detailed records.**

| <b>Relevant text of PPAR Pro12Ala</b>                                         |                                                                                                                                                        |
|-------------------------------------------------------------------------------|--------------------------------------------------------------------------------------------------------------------------------------------------------|
| 1. Peroxisome Proliferator-Activated Receptor gamma                           | 20. Kidney Insufficiency, Chronic                                                                                                                      |
| 2. PPAR gamma                                                                 | 21. CKD                                                                                                                                                |
| 3. mPPARgamma                                                                 | 22. Kidney Failure, Chronic                                                                                                                            |
| 4. mPPARgamma1                                                                | 23. Chronic Kidney Failure                                                                                                                             |
| 5. mPPARgamma2                                                                | 24. End-Stage Kidney Disease                                                                                                                           |
| 6. PPARgamma                                                                  | 25. End-Stage Renal Disease                                                                                                                            |
| 7. PPARgamma2                                                                 | 26. End-Stage Renal Failure                                                                                                                            |
| 8. PPARgamma3                                                                 | 27. Renal Disease, End-Stage                                                                                                                           |
| 9. Thiazolidinedione Receptor                                                 | 28. Renal Failure, Chronic                                                                                                                             |
| 10. Pro12Ala                                                                  | 29. Renal Failure, End-Stage                                                                                                                           |
| 11. Pro12Ala                                                                  | 30. ESKD                                                                                                                                               |
| 12. SNP                                                                       | 31. ESRD                                                                                                                                               |
| 13. rs1801282                                                                 | 32. ESRF                                                                                                                                               |
| 14. ((1 or 2 or 3 or 4 or 5 or 6 or 7 or 8 or 9) and ((10 or 11 or 12)) or 13 | 33. Proteinuria                                                                                                                                        |
| <b>Relevant text of chronic kidney disease</b>                                | 34. Albuminuria                                                                                                                                        |
| 15. Renal Insufficiency, Chronic                                              | 35. Nephropathy                                                                                                                                        |
| 16. Chronic kidney disease                                                    | 36. Nephritis                                                                                                                                          |
| 17. Chronic Kidney Insufficiency                                              | 37. Dialysis                                                                                                                                           |
| 18. Chronic Renal Diseases                                                    | 38. Glomerular filtration rate                                                                                                                         |
| 19. Chronic Renal Insufficiency                                               | 39. GFR                                                                                                                                                |
|                                                                               | 40. 15 or 16 or 17 or 18 or 19 or 20 or 21 or 22 or 23 or 24 or 25 or 26 or 27 or 28 or 29 or 30 or 31 or 32 or 33 or 34 or 35 or 36 or 37 or 38 or 39 |
|                                                                               | <b>Combined (Final strategy)</b>                                                                                                                       |
|                                                                               | 41. 14 and 40                                                                                                                                          |

Web sites and uniform resource locator:

**PUBMED:** <http://www.ncbi.nlm.nih.gov/pubmed>

**EMBASE:** <https://www.embase.com>

**Records from PUBMED [1-36]**

Mata-analysis [1-6], Comment or response [7], No appropriate controlled group [8-10], Duplicated sample [11], Age < 18 [12], Inconsistent CKD definition [13-17], Inconsistent SNP definition [18-20], Included studies [21-36]

**Records from EMBASE [37-44]**

Mata-analysis [37], Inconsistent CKD definition [38-40], Inconsistent SNP definition [41], No appropriate controlled group [42], Included studies [43, 44]

## Reference

1. Li, T., et al., *The association between lipid metabolism gene polymorphisms and nephropathy in type 2 diabetes: a meta-analysis*. Int Urol Nephrol, 2015. **47**(1): p. 117-30.
2. Ding, J., et al., *Peroxisome proliferator-activated receptor gamma Pro12Ala polymorphism decrease the risk of diabetic nephropathy in type 2 diabetes: a meta analysis*. Int J Clin Exp Med, 2015. **8**(5): p. 7655-60.
3. Zhou, T.B., X.F. Guo, and S.S. Yin, *Association of peroxisome proliferator-activated receptor gamma Pro12Ala gene polymorphism with type 2 diabetic nephropathy risk in Caucasian population*. J Recept Signal Transduct Res, 2014. **34**(3): p. 180-4.
4. Liu, G., et al., *Relationship between PPARgamma Pro12Ala gene polymorphism and type 2 diabetic nephropathy risk in Asian population: results from a meta-analysis*. J Recept Signal Transduct Res, 2014. **34**(2): p. 131-6.
5. Wang, L., et al., *The association between the PPARgamma2 Pro12Ala polymorphism and nephropathy susceptibility in type 2 diabetes: a meta-analysis based on 9,176 subjects*. Diagn Pathol, 2013. **8**: p. 118.
6. Yu, R., H. Bo, and S. Huang, *Association between the PPARG gene polymorphism and the risk of diabetic nephropathy: a meta-analysis*. Genet Test Mol Biomarkers, 2012. **16**(5): p. 429-34.
7. Lapice, E., et al., *Comment on: Zhang et al. Peroxisome proliferator-activated receptor gamma polymorphism Pro12Ala is associated with nephropathy in type 2 diabetes: evidence from meta-analysis of 18 studies*. Diabetes Care 2012;35:1388-1393. Diabetes Care, 2013. **36**(1): p. e18.
8. Chao, C.T., et al., *Diabetes mellitus, superoxide dismutase and peroxisome proliferator activated receptor gamma polymorphisms modify the outcome of end-stage renal disease patients of Han Chinese origin*. Nephrology (Carlton), 2016.
9. Lapice, E., et al., *The PPARgamma2 Pro12Ala variant is protective against progression of nephropathy in people with type 2 diabetes*. J Transl Med, 2015. **13**: p. 85.
10. Szeto, C.C., et al., *Peroxisome proliferator-activated receptor-gamma gene polymorphism and risk of cardiovascular disease in patients with diabetic nephropathy*. Am J Nephrol, 2008. **28**(5): p. 715-22.
11. Chao, C.T., et al., *Interplay between Superoxide Dismutase, Glutathione Peroxidase, and Peroxisome Proliferator Activated Receptor Gamma Polymorphisms on the Risk of End-Stage Renal Disease among Han Chinese*

- Patients. Oxid Med Cell Longev*, 2016. **2016**: p. 8516748.
12. Jin, J., et al., *Correlation between PPAR Gene Polymorphisms and Primary Nephrotic Syndrome in Children*. *PPAR Res*, 2013. **2013**: p. 927915.
  13. Hosseini, S.M., et al., *The association of previously reported polymorphisms for microvascular complications in a meta-analysis of diabetic retinopathy*. *Hum Genet*, 2015. **134**(2): p. 247-57.
  14. Mohamed Youssef, S., et al., *Interaction Effects of the Leu162Val PPAR alpha and Pro12Ala PPAR gamma 2 Gene Variants with Renal Function in Metabolic Syndrome Population*. *PPAR Res*, 2013. **2013**: p. 329862.
  15. Hocher, B., et al., *Interaction of maternal peroxisome proliferator-activated receptor gamma2 Pro12Ala polymorphism with fetal sex affects maternal glycemic control during pregnancy*. *Pharmacogenet Genomics*, 2010. **20**(2): p. 139-42.
  16. Malecki, M.T., et al., *Alanine variant of the Pro12Ala polymorphism of the PPARgamma gene might be associated with decreased risk of diabetic retinopathy in type 2 diabetes*. *Diabetes Res Clin Pract*, 2008. **80**(1): p. 139-45.
  17. Smith, W.M., et al., *Opposite association of two PPARG variants with cancer: overrepresentation of H449H in endometrial carcinoma cases and underrepresentation of P12A in renal cell carcinoma cases*. *Hum Genet*, 2001. **109**(2): p. 146-51.
  18. Gayathri, S.B., et al., *Association of the PPARGC1A gene polymorphism with diabetic nephropathy in an Asian Indian population (CURES-41)*. *Metab Syndr Relat Disord*, 2010. **8**(2): p. 119-26.
  19. Omori, S., et al., *Association of CDKAL1, IGF2BP2, CDKN2A/B, HHEX, SLC30A8, and KCNJ11 with susceptibility to type 2 diabetes in a Japanese population*. *Diabetes*, 2008. **57**(3): p. 791-5.
  20. Sale, M.M., et al., *Variants of the transcription factor 7-like 2 (TCF7L2) gene are associated with type 2 diabetes in an African-American population enriched for nephropathy*. *Diabetes*, 2007. **56**(10): p. 2638-42.
  21. Zambrano-Galván, G., et al., *Risk of microalbuminuria in relatives of subjects with diabetic nephropathy: A predictive model based on multivariable dimensionality reduction approach*. *Clinical Nephrology*, 2015. **83**(2): p. 86-92.
  22. Chao, C.T., et al., *Sequence variants of peroxisome proliferator-activated receptor-gamma gene and the clinical courses of patients with end-stage renal disease*. *Dis Markers*, 2015. **2015**: p. 763459.
  23. Yang, B., et al., *The Rate of Decline of Glomerular Filtration Rate May Not*

- Be Associated with Polymorphism of the PPAR2 Gene in Patients with Type 1 Diabetes and Nephropathy.* PPAR Res, 2014. **2014**: p. 523584.
24. Liu, F., et al., *Association of peroxisome proliferator-activated receptor gene Pro12Ala and C161T polymorphisms with cardiovascular risk factors in maintenance hemodialysis patients.* Molecular Biology Reports, 2014. **41**(11): p. 7555-7565.
  25. Azab, M.M., et al., *Peroxisome proliferator activated receptor gamma2 gene Pro12Ala gene polymorphism in type 2 diabetes and its relationship with diabetic nephropathy.* Clin Lab, 2014. **60**(5): p. 743-9.
  26. Bhaskar, L.V., et al., *Role of the ACE ID and PPARG P12A Polymorphisms in Genetic Susceptibility of Diabetic Nephropathy in a South Indian Population.* Nephrourol Mon, 2013. **5**(3): p. 813-7.
  27. Zhang, H., et al., *Peroxisome proliferator-activated receptor gamma polymorphism Pro12Ala Is associated with nephropathy in type 2 diabetes: evidence from meta-analysis of 18 studies.* Diabetes Care, 2012. **35**(6): p. 1388-93.
  28. De Cosmo, S., et al., *PPARGgamma2 P12A polymorphism and albuminuria in patients with type 2 diabetes: a meta-analysis of case-control studies.* Nephrol Dial Transplant, 2011. **26**(12): p. 4011-6.
  29. Liu, L., et al., *Pro12Ala polymorphism in the PPARG gene contributes to the development of diabetic nephropathy in Chinese type 2 diabetic patients.* Diabetes Care, 2010. **33**(1): p. 144-9.
  30. Lapice, E., et al., *Pro12Ala polymorphism in the PPARG gene contributes to the development of diabetic nephropathy in Chinese type 2 diabetic patients: comment on the study by Liu et al.* Diabetes Care, 2010. **33**(8): p. e114; author reply e115.
  31. De Cosmo, S., et al., *Impact of the PPAR-gamma2 Pro12Ala polymorphism and ACE inhibitor therapy on new-onset microalbuminuria in type 2 diabetes: evidence from BENEDICT.* Diabetes, 2009. **58**(12): p. 2920-9.
  32. Jorsal, A., et al., *The PPAR gamma 2 Pro12Ala variant predicts ESRD and mortality in patients with type 1 diabetes and diabetic nephropathy.* Mol Genet Metab, 2008. **94**(3): p. 347-51.
  33. Pollex, R.L., et al., *Peroxisome proliferator-activated receptor gamma polymorphism Pro12Ala is associated with nephropathy in type 2 diabetes.* J Diabetes Complications, 2007. **21**(3): p. 166-71.
  34. Yao, Q., et al., *Peroxisome proliferator-activated receptor gamma polymorphisms affect systemic inflammation and survival in end-stage renal disease patients starting renal replacement therapy.* Atherosclerosis, 2005.

- 182(1):** p. 105-11.
35. Caramori, M.L., et al., *The human peroxisome proliferator-activated receptor gamma2 (PPARgamma2) Pro12Ala polymorphism is associated with decreased risk of diabetic nephropathy in patients with type 2 diabetes.* Diabetes, 2003. **52(12):** p. 3010-3.
  36. Herrmann, S.M., et al., *Peroxisome proliferator-activated receptor-gamma2 polymorphism Pro12Ala is associated with nephropathy in type 2 diabetes: The Berlin Diabetes Mellitus (BeDiaM) Study.* Diabetes, 2002. **51(8):** p. 2653-7.
  37. Cao, Y., et al., *Meta-analysis of the association of Pro12Ala polymorphism of peroxisome proliferator activated receptor gamma gene with diabetic kidney disease in Chinese Han population.* Hong Kong Journal of Nephrology, 2015. **17(2):** p. S8.
  38. Algenabi, A.H.A.F. and B.a.A. Hadi, *Study of PPARG2 Gene Polymorphism (Pro12Ala) in Iraqi Patients with Type 2 Diabetes Mellitus.* 2016.
  39. Liu, Y.Q., et al., *Association of Pro12Ala polymorphism of PPAR- $\gamma$ 2 Gene and diabetic retinopathy in type 2 diabetes.* International Eye Science, 2013. **13(6):** p. 1108-1111.
  40. Kuo, T.Y., et al., *A two-stage matched case-control study on multiple hypertensive candidate genes in han Chinese.* American Journal of Hypertension, 2012. **25(7):** p. 804-811.
  41. Wang, S.Y., et al., *The association between FNDC5 gene polymorphisms and diabetic retinopathy in Chinese type 2 diabetes patients.* Diabetes Research and Clinical Practice, 2014. **106:** p. S89.
  42. Kurzawski, M., et al., *Analysis of common type 2 diabetes mellitus genetic risk factors in new-onset diabetes after transplantation in kidney transplant patients medicated with tacrolimus.* European Journal of Clinical Pharmacology, 2012. **68(12):** p. 1587-1594.
  43. Avzaletdinova, D.S., et al., *Association of variable rs1801282 locus of PPARG2 gene with diabetic nephropathy.* Russian Journal of Genetics, 2016. **52(8):** p. 877-881.
  44. Osman, N.A., et al., *The association between diabetic nephropathy and polymorphisms of PPAR PRO12ALA and CCR5 32 genes in type 2 diabetes.* Nephrology Dialysis Transplantation, 2013. **28:** p. i382-i383.
