# Supplementary material for: PPARG Pro12Ala Polymorphism with CKD in Asians: A Meta-Analysis Combined with a Case-Control Study—A Key for Reaching Null Association
Source: MDPI journal article supplement (doi:10.3390/genes11060705), 2020-06-26
Supplement: s1 [file s1]

**S3 Table. General description about the publications included in the meta-analysis**

| Author        | Year | Country | Ethnicity | Study design <sup>a</sup> | CKD type <sup>b</sup> | Kidney function of case <sup>c</sup> | Definition of case group <sup>d</sup>                |
|---------------|------|---------|-----------|---------------------------|-----------------------|--------------------------------------|------------------------------------------------------|
| This Study    | 2017 | Taiwan  | Asian     | CC                        | Mixed                 | ESRD                                 | HD                                                   |
| Avzaletdinova | 2016 | Russia  | Caucasian | CS                        | T2DN                  | non-ESRD                             | eGFR < 60ml/min/1.73m <sup>2</sup>                   |
| Galvan        | 2015 | Mexican | Caucasian | CS                        | T2DN                  | non-ESRD                             | 300 > albumin ≥ 30mg/dl and UACR > 30mg/g            |
| Chao          | 2015 | Taiwan  | Asian     | CC                        | Mixed                 | ESRD                                 | RRT                                                  |
| Yang          | 2014 | England | Caucasian | CC                        | T1DN                  | non-ESRD                             | Albuminuria > 300mg/24hr                             |
| Liu           | 2014 | China   | Asian     | CC                        | Mixed                 | ESRD                                 | HD                                                   |
| Azab          | 2014 | Egypt   | Caucasian | CC                        | T2DN                  | non-ESRD                             | Micro-albumin                                        |
| Hao           | 2013 | China   | Asian     | CC                        | T2DN                  | non-ESRD                             | UAE > 20g/min                                        |
| Osman         | 2013 | Egypt   | Caucasian | CC                        | T2DN                  | non-ESRD                             | Proteinuria and eGFR < 60ml/min/1.73m <sup>2</sup>   |
| Bhaskar       | 2013 | India   | Asian     | CC                        | T2DN                  | non-ESRD                             | UAE > 300mg/l                                        |
| Zhang         | 2012 | India   | Asian     | CC                        | T2DN                  | non-ESRD                             | ACR > 300μg/mg                                       |
| Zhu           | 2011 | China   | Asian     | CC                        | T2DN                  | non-ESRD                             | UAER ≥ 20μg/min                                      |
| De Cosmo(1)   | 2011 | Italian | Caucasian | CC                        | T2DN                  | non-ESRD                             | ACR > 2.5(3.5)mg/mmol in men(women)                  |
| De Cosmo(2)   | 2011 | Italian | Caucasian | CC                        | T2DN                  | non-ESRD                             | ACR > 2.5(3.5)mg/mmol in men(women)                  |
| De Cosmo(3)   | 2011 | Italian | Caucasian | CC                        | T2DN                  | non-ESRD                             | ACR > 2.5(3.5)mg/mmol in men(women)                  |
| Liu           | 2010 | China   | Asian     | CC                        | T2DN                  | non-ESRD                             | AER ≥ 30mg/24hr                                      |
| Lapice        | 2010 | Italian | Caucasian | CC                        | T2DN                  | non-ESRD                             | eGFR < 60ml/min/1.73m <sup>2</sup> or Scr > 1.2mg/dl |
| Wu            | 2009 | Taiwan  | Asian     | CC                        | T2DN                  | non-ESRD                             | ACR ≥ 300mg/24h and Scr > 1.7 mg/dl                  |

| Author    | Year | Country | Ethnicity | Study design <sup>a</sup> | CKD type <sup>b</sup> | Kidney function of case <sup>c</sup> | Definition of case group <sup>d</sup>             |
|-----------|------|---------|-----------|---------------------------|-----------------------|--------------------------------------|---------------------------------------------------|
| De Cosmo  | 2009 | Italian | Caucasian | CC                        | T2DN                  | non-ESRD                             | 200 > UAE ≥ 20µg/min                              |
| Wei       | 2008 | China   | Asian     | CC                        | T2DN                  | non-ESRD                             | Ccr < 120 ml/min/1.73m <sup>2</sup>               |
| Li        | 2008 | China   | Asian     | CC                        | T2DN                  | non-ESRD                             | AER ≥ 30mg/24hr                                   |
| Jorsal    | 2008 | Danmark | Caucasian | CC                        | T1DN                  | ESRD                                 | Albuminuria > 300mg/24hr                          |
| Pollex    | 2007 | Canada  | Caucasian | CS                        | T2DN                  | non-ESRD                             | ACR > 2.0(2.8)mg/mmol in men(women)               |
| Erdogan   | 2007 | Turk    | Caucasian | CC                        | T2DN                  | non-ESRD                             | 300 > AER ≥ 30 mg/24hr                            |
| Stefanski | 2006 | Poland  | Caucasian | CC                        | T2DN                  | non-ESRD                             | Albuminuria > 30mg/24hr                           |
| Yao       | 2005 | Sweden  | Caucasian | CC                        | Mixed                 | ESRD                                 | RRT                                               |
| Wu        | 2004 | China   | Asian     | CC                        | T2DN                  | non-ESRD                             | AER > 30mg/24hr                                   |
| Caramori  | 2003 | Brazil  | Caucasian | CC                        | T2DN                  | non-ESRD                             | AER > 200 µg/min and serum creatinine > 2.0 mg/dl |
| Herrmann  | 2002 | Germany | Caucasian | CC                        | T2DN                  | non-ESRD                             | UAE > 200 µg/min or RRT                           |
| Mori      | 2001 | Japan   | Asian     | CC                        | T2DN                  | non-ESRD                             | UAE > 10 mg/ml                                    |

<sup>a</sup>: CC – case control study; CS – cross sectional study.

<sup>b</sup>: T1DN – Type 1 diabetic nephropathy; T2DN –Type 2 diabetic nephropathy; Mixed –Diabetic nephropathy, hypertensive nephropathy or kidney inflammation

<sup>c</sup>: ESRD – only ESRD patients; non-ESRD – not only ESRD patients.

<sup>d</sup>: ACR – albumin creatinine ratio; AER – albumin excretion rate; UAE –urinary albumin excretion rate; eGFR – estimated glomerular filtration rate; HD – hemodialysis; CCr – creatinine clearance; RRT – renal replacement therapy; CT – computed tomography; SCr – serum creatinine.
