# Supplementary material for: PPARG Pro12Ala Polymorphism with CKD in Asians: A Meta-Analysis Combined with a Case-Control Study—A Key for Reaching Null Association
Source: MDPI journal article supplement (doi:10.3390/genes11060705), 2020-06-26

A

All

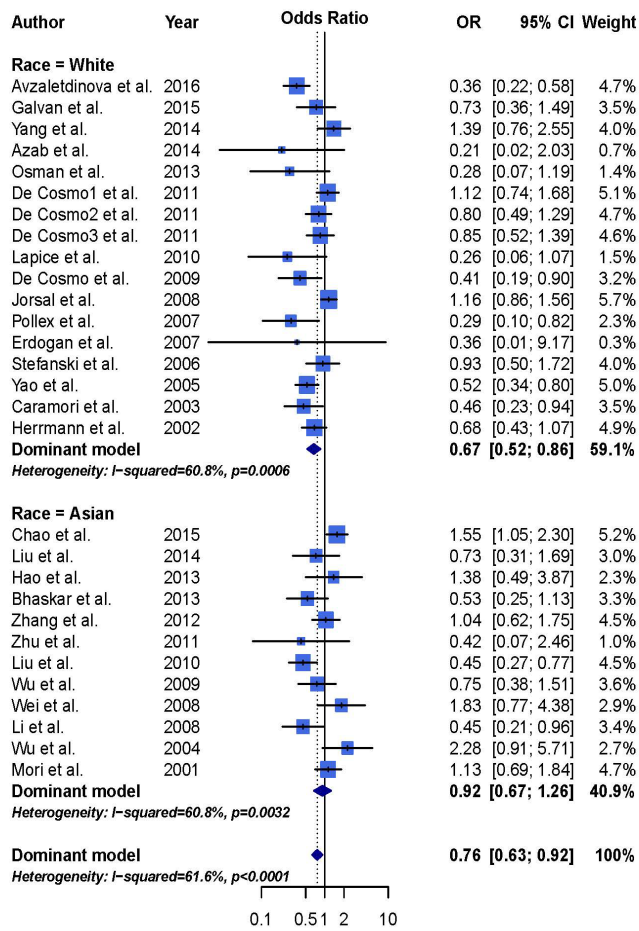

B

All

Dominant model

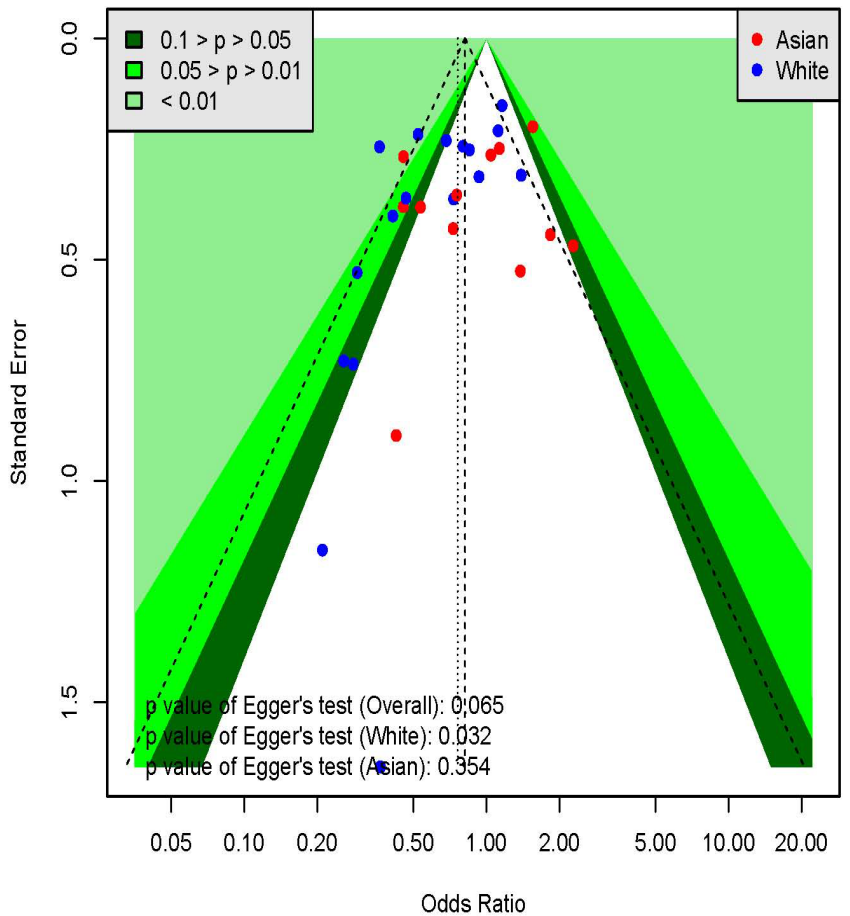

C Incomplete genotype

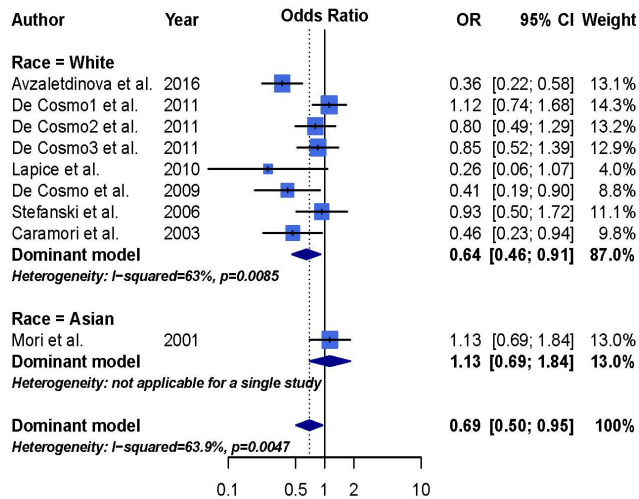

D Incomplete genotype

Dominant model

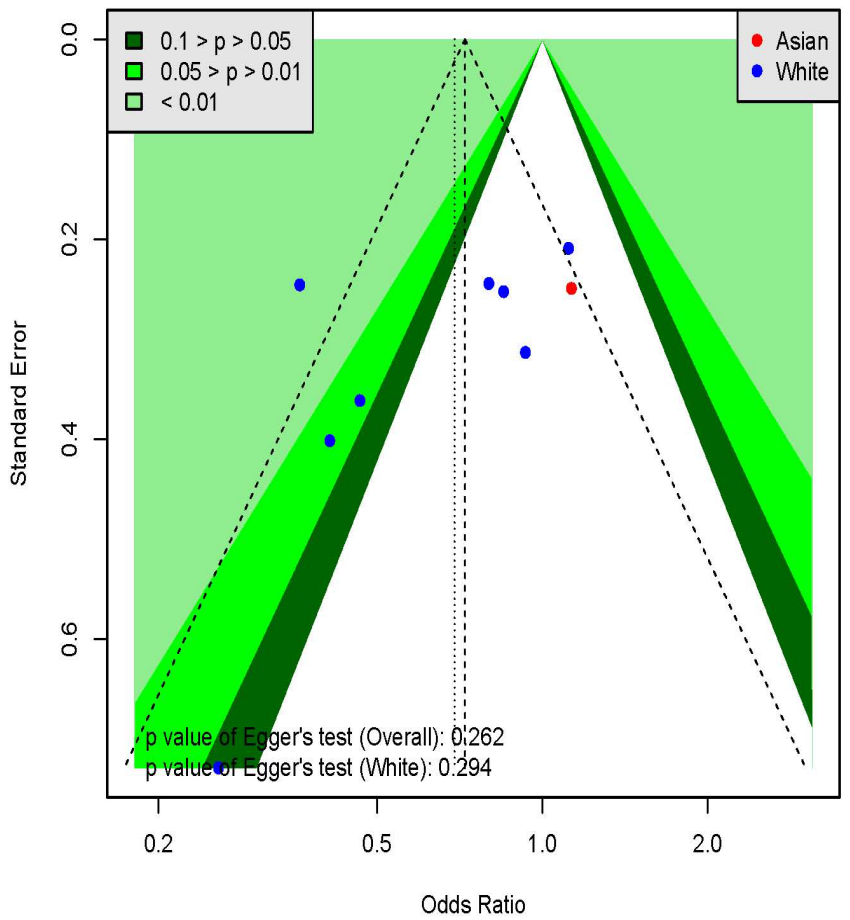

E Complete genotype

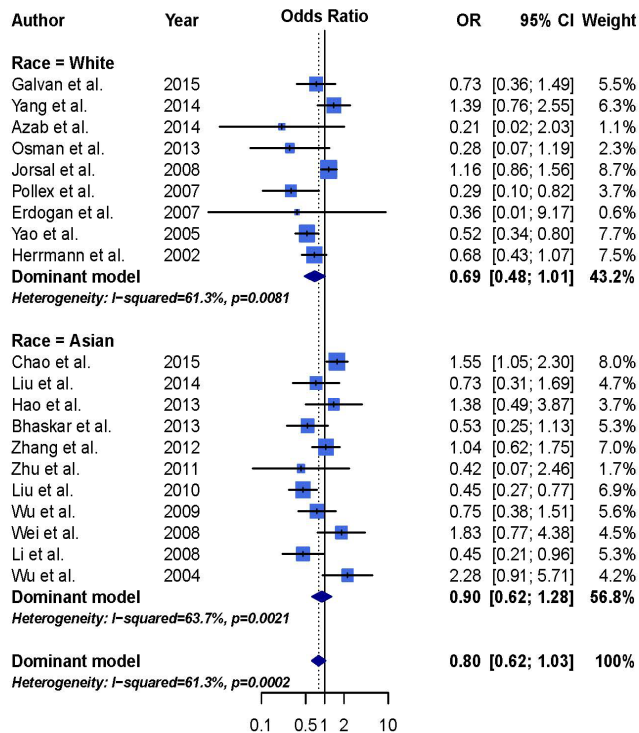

F

Complete genotype

Dominant model

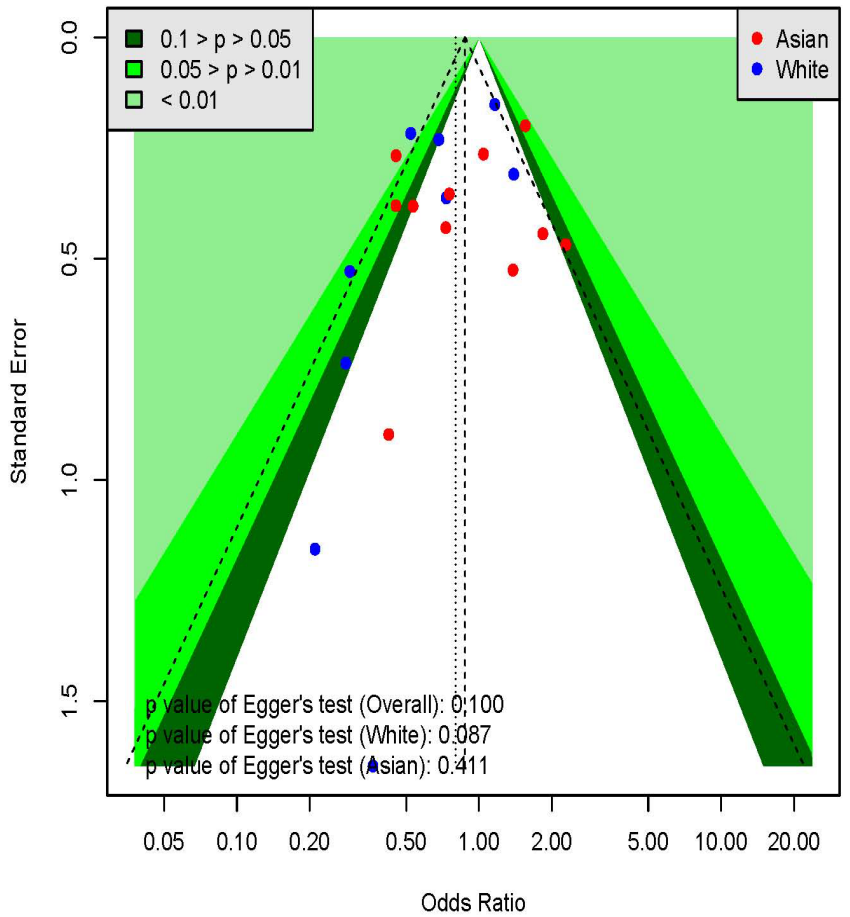

Supplement: s1 [file s1]
