# Supplementary material for: PPARG Pro12Ala Polymorphism with CKD in Asians: A Meta-Analysis Combined with a Case-Control Study—A Key for Reaching Null Association
Source: MDPI journal article supplement (doi:10.3390/genes11060705), 2020-06-26
Supplement: s1 [file s1]

**S4 Table. Extracted information from the publications included in the meta-analysis**

| Author        | Year | Quality <sup>a</sup> | Sex <sup>b</sup> | BMI <sup>c</sup> | DN <sup>d</sup> | Case group |    |    | Control group |    |    |
|---------------|------|----------------------|------------------|------------------|-----------------|------------|----|----|---------------|----|----|
|               |      |                      |                  |                  |                 | CC         | CG | GG | CC            | CG | GG |
| This Study    | 2017 | 9                    | 50.80            | 24.66            | 80.3            | 781        | 65 | 1  | 762           | 80 | 4  |
| Avzaletdinova | 2016 | 2                    |                  | 30.18            | 100             | 140        | 39 |    | 83            | 64 |    |
| Galvan        | 2015 | 4                    | 30.00            | 29.70            |                 | 46         | 22 | 2  | 35            | 24 | 1  |
| Chao          | 2015 | 7                    | 44.80            |                  | 37.7            | 635        | 58 | 5  | 735           | 46 | 1  |
| Yang          | 2014 | 6                    | 44.16            |                  | 100             | 90         | 25 | 1  | 125           | 23 | 3  |
| Liu, F        | 2014 | 5                    | 53.53            | 21.6             | 21.2            | 90         | 9  | 0  | 131           | 18 | 0  |
| Azab          | 2014 | 4                    | 52.00            | 28.00            | 100             | 25         | 1  | 0  | 21            | 4  | 0  |
| Hao           | 2013 | 3                    | 48.89            |                  | 100             | 77         | 13 | 0  | 49            | 6  | 0  |
| Osman         | 2013 | 6                    |                  | 30.8             | 100             | 32         | 5  | 0  | 9             | 5  | 0  |
| Bhaskar       | 2013 | 4                    |                  |                  | 100             | 37         | 17 | 0  | 36            | 31 | 0  |
| Zhang         | 2012 | 4                    |                  |                  | 100             | 113        | 26 | 2  | 206           | 48 | 1  |
| Zhu           | 2011 | 6                    | 53.65            |                  | 100             | 39         | 2  | 0  | 33            | 4  | 0  |
| De Cosmo(1)   | 2011 | 4                    | 62.07            | 31.00            | 100             | 221        | 40 |    | 499           | 81 |    |
| De Cosmo(2)   | 2011 | 4                    | 51.57            | 30.3             | 100             | 224        | 30 |    | 316           | 53 |    |
| De Cosmo(3)   | 2011 | 4                    | 63.36            | 30.1             | 100             | 207        | 25 |    | 422           | 60 |    |
| Liu           | 2010 | 6                    | 52.82            |                  | 100             | 499        | 33 | 0  | 199           | 29 | 0  |
| Lapice        | 2010 | 4                    |                  |                  |                 | 53         | 2  |    | 606           | 89 |    |
| Wu            | 2009 | 6                    | 54.63            | 25.75            | 100             | 197        | 15 | 2  | 157           | 12 | 6  |

| Author    | Year | Quality <sup>a</sup> | Sex <sup>b</sup> | BMI <sup>c</sup> | DN <sup>d</sup> | Case group |     |     | Control group |     |    |
|-----------|------|----------------------|------------------|------------------|-----------------|------------|-----|-----|---------------|-----|----|
|           |      |                      |                  |                  |                 | CC         | CG  | GG  | CC            | CG  | GG |
| De Cosmo  | 2009 | 7                    | 52.63            | 29.06            | 100             | 86         | 7   | 856 | 170           |     |    |
| Wei       | 2008 | 4                    | 51.22            |                  | 100             | 68         | 13  | 1   | 89            | 10  | 0  |
| Li        | 2008 | 4                    | 49.09            | 25.70            | 100             | 150        | 15  | 0   | 77            | 17  | 0  |
| Pollex    | 2007 | 8                    | 38.99            | 30.39            | 100             | 89         | 6   | 0   | 52            | 12  | 0  |
| Jorsal    | 2008 | 7                    | 60.72            | 24.30            | 100             | 290        | 110 | 15  | 312           | 105 | 11 |
| Erdogan   | 2007 | 3                    |                  |                  | 100             | 43         | 0   | 0   | 47            | 1   | 0  |
| Stefanski | 2006 | 5                    | 44.40            | 34.20            | 100             | 68         | 25  |     | 81            | 32  |    |
| Yao       | 2005 | 6                    | 61.43            | 24.52            | 28.07           | 180        | 48  | 1   | 136           | 63  | 8  |
| Wu        | 2004 | 4                    |                  |                  | 100             | 194        | 25  | 1   | 102           | 6   | 0  |
| Caramori  | 2003 | 5                    | 63.5             | 27.40            | 100             | 93         | 11  |     | 169           | 43  |    |
| Herrmann  | 2002 | 6                    | 49.44            | 28.06            | 100             | 154        | 37  | 6   | 144           | 55  | 4  |
| Mori      | 2001 | 7                    | 45.21            | 23.20            | 100             | 580        | 28  |     | 982           | 42  |    |

<sup>a</sup>: Literature quality, score; <sup>b</sup>: Male ratio, percentage; <sup>c</sup>: Body Mass Index, kg/m<sup>2</sup>; <sup>d</sup>: Prevalence of Diabetes mellitus, percentage.
