# Supplementary figures and images for: PPARG Pro12Ala Polymorphism with CKD in Asians: A Meta-Analysis Combined with a Case-Control Study—A Key for Reaching Null Association
Source: MDPI journal article supplement (doi:10.3390/genes11060705), 2020-06-26

A

Forest plot

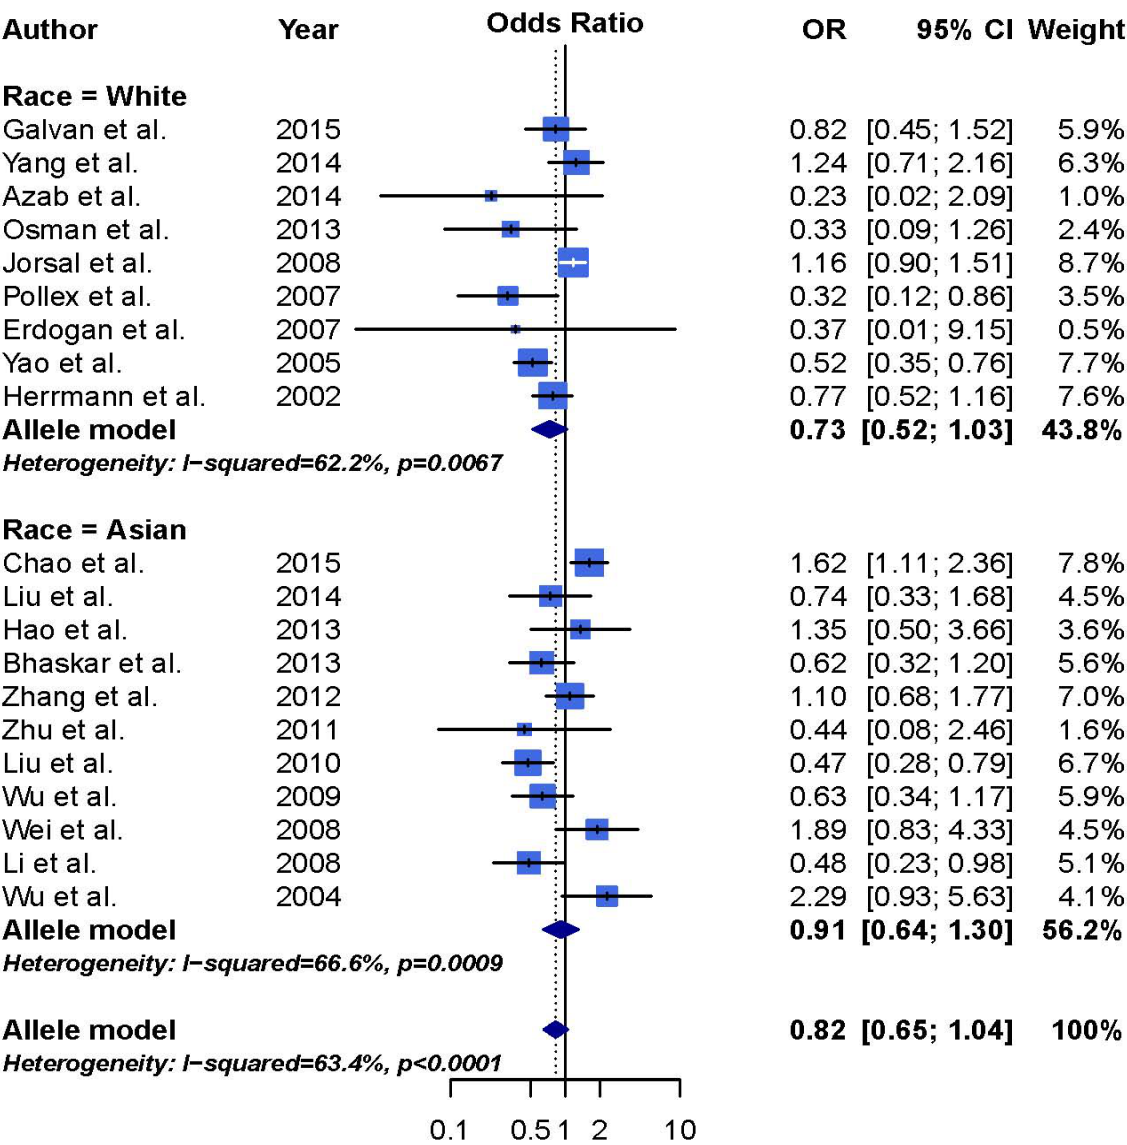

B

Funnel plot  
Allele model

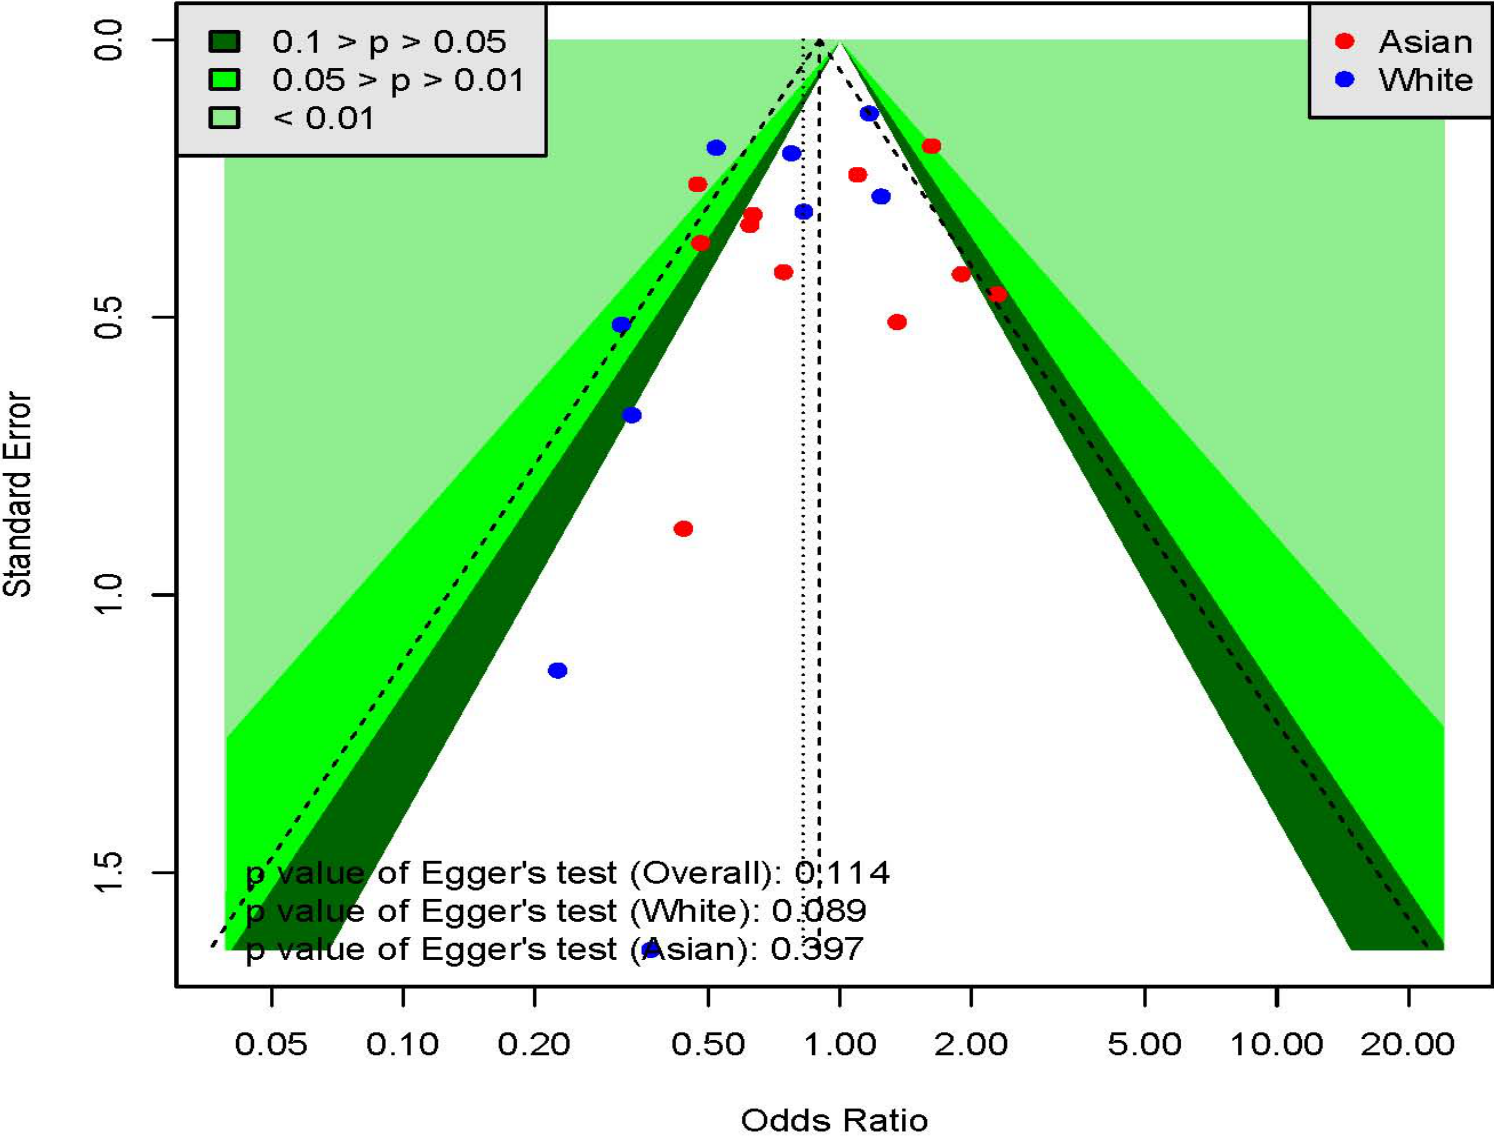

Supplement: s1 [file s1]

A

# Forest plot

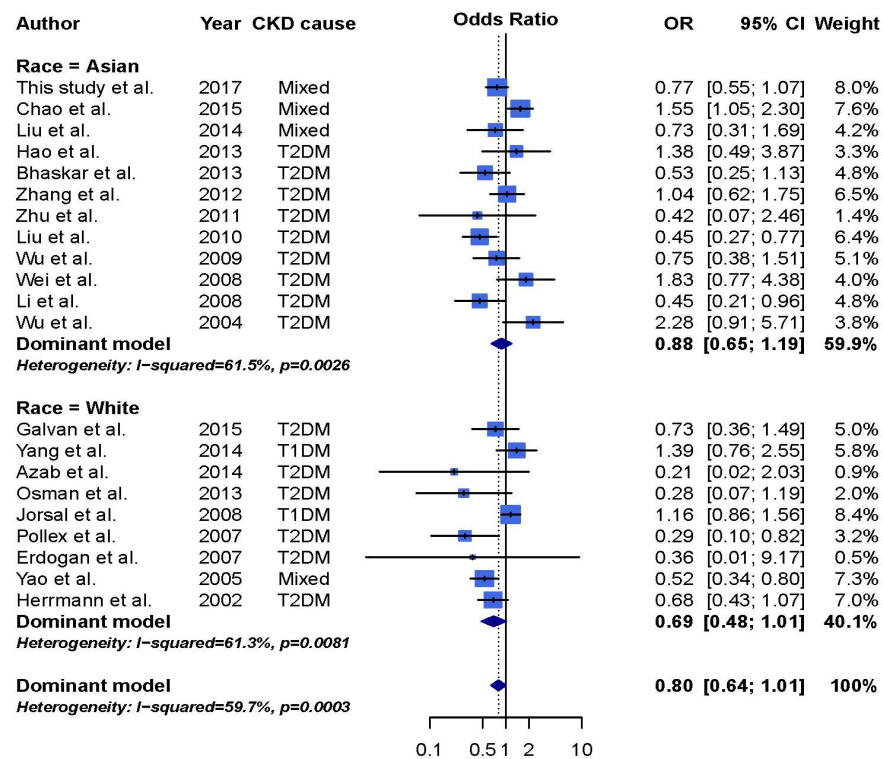

B

# Funnel plot

Dominant model

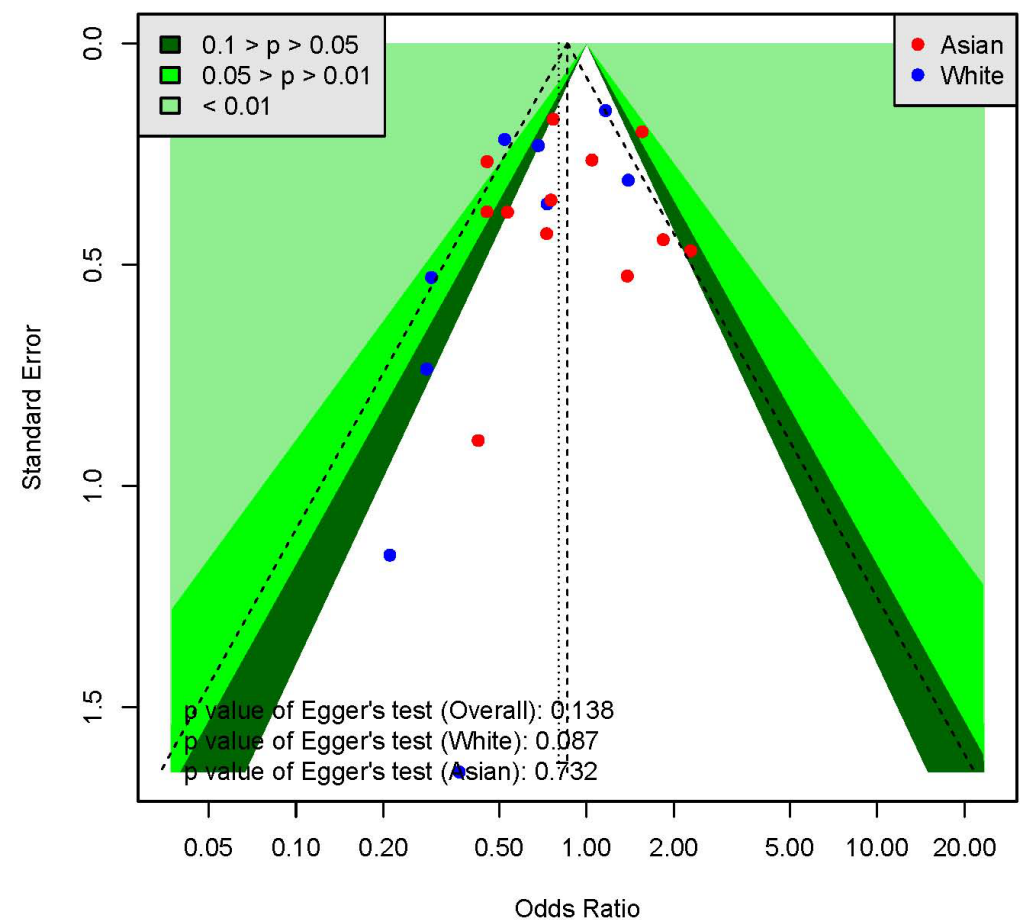

C

# Forest plot

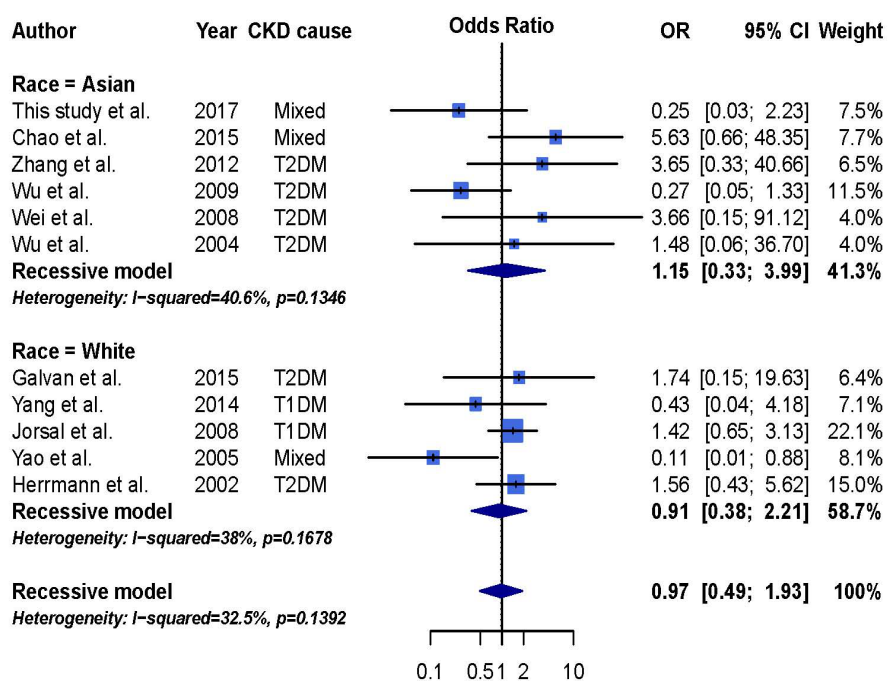

D

# Funnel plot

Recessive model

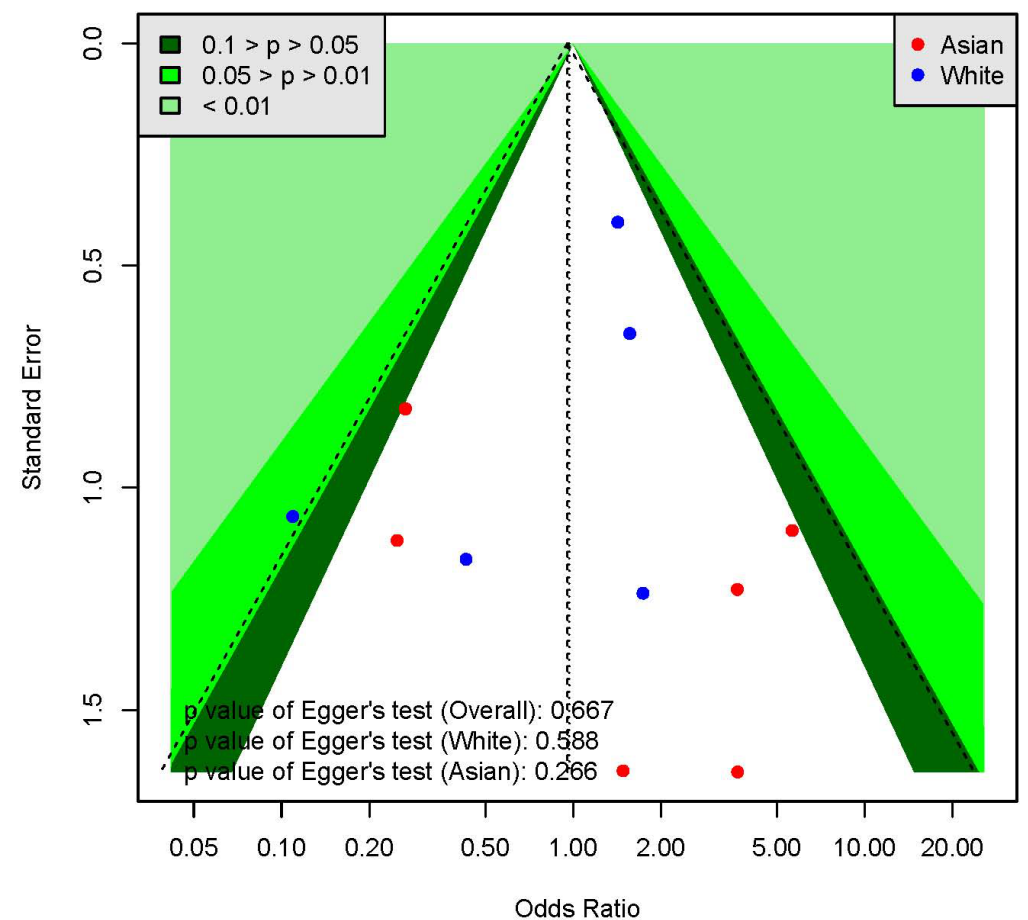

Supplement: s1 [file s1]

Sample\_size is a Two-sided graph

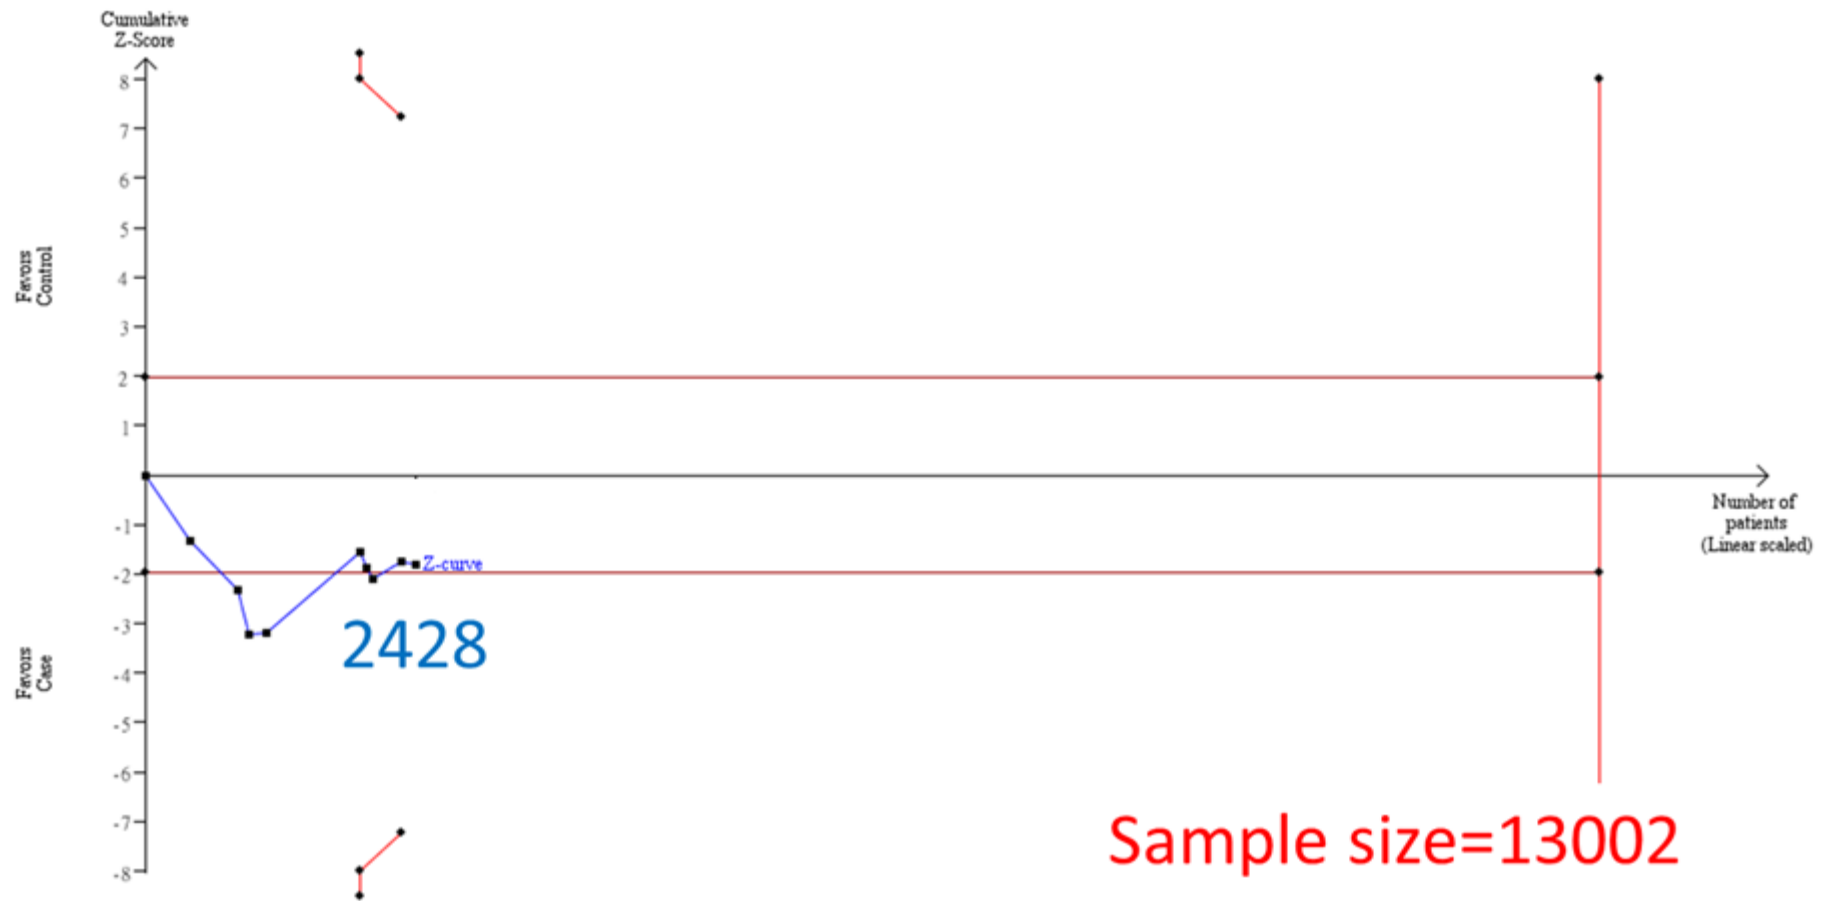

Supplement: s1 [file s1]
